# Supplementary material for: A Novel Dynamic Model for Health Economic Analysis of Influenza Vaccination in the Elderly
Source: Springer Nature journal article supplement (doi:10.1007/s40121-015-0076-8), 2015-09-09
Supplement: MOESM1 [file 9339732]

## ELECTRONIC SUPPLEMENTARY MATERIAL

### Epidemiologic Module Inputs

**Table S1** Contact matrix

| Age (y)         | Infectious (j) |      |      |       |       |       |       |       |      |
|-----------------|----------------|------|------|-------|-------|-------|-------|-------|------|
|                 | 0-3            | 4-6  | 7-9  | 10-19 | 20-34 | 35-49 | 50-64 | 65-69 | ≥70  |
| Susceptible (i) |                |      |      |       |       |       |       |       |      |
| 0-3             | 0.98           | 1.36 | 1.55 | 0.87  | 1.07  | 0.64  | 0.12  | 0.07  | 0.06 |
| 4-6             | 0.54           | 1.00 | 1.23 | 0.74  | 0.49  | 0.43  | 0.06  | 0.04  | 0.03 |
| 7-9             | 0.44           | 0.99 | 1.26 | 0.78  | 0.33  | 0.40  | 0.05  | 0.03  | 0.03 |
| 10-19           | 1.02           | 2.52 | 3.27 | 2.72  | 1.59  | 2.28  | 0.55  | 0.30  | 0.19 |
| 20-34           | 0.91           | 0.93 | 0.95 | 1.02  | 3.51  | 3.22  | 1.33  | 0.80  | 0.38 |
| 35-49           | 0.50           | 0.92 | 1.14 | 1.42  | 3.15  | 3.59  | 1.32  | 0.79  | 0.40 |
| 50-64           | 0.17           | 0.25 | 0.29 | 0.63  | 2.52  | 2.54  | 1.69  | 1.17  | 0.54 |
| 65-69           | 0.05           | 0.06 | 0.07 | 0.14  | 0.58  | 0.58  | 0.42  | 0.50  | 0.23 |
| ≥70             | 0.06           | 0.09 | 0.10 | 0.11  | 0.52  | 0.55  | 0.37  | 0.40  | 0.92 |

Source: Del Valle et al. [1], adapted to match the age structure of the model

---

**Table S2** Population distribution

---

| <b>Age range (y)</b> | <b>%</b>      | <b>Population</b>  |
|----------------------|---------------|--------------------|
| 0–3                  | 4.59          | 14,077,000         |
| 4–6                  | 3.97          | 12,188,400         |
| 7–9                  | 3.99          | 12,249,600         |
| 10–19                | 13.64         | 41,844,000         |
| 20–34                | 20.57         | 63,097,000         |
| 35–49                | 20.05         | 61,510,000         |
| 50–64                | 19.67         | 60,343,000         |
| 65–69                | 4.43          | 13,599,000         |
| 70+                  | 9.10          | 27,907,000         |
| <b>Total</b>         | <b>100.00</b> | <b>306,815,000</b> |

---

Source: 2012 US Current Population Survey [2]

---

**Table S3** US influenza virologic surveillance

| Season                                              | % Type B    | % Yamagata   | % Victoria  | % Type A    | % H1N1      | % H3N2      |
|-----------------------------------------------------|-------------|--------------|-------------|-------------|-------------|-------------|
| 1999–2000                                           | 0.4         | 100.0        | 0.0         | 99.6        | 3.2         | 96.8        |
| <b>2000–2001<br/>(high/low match<br/>scenarios)</b> | <b>46.4</b> | <b>100.0</b> | <b>0.0</b>  | <b>53.6</b> | <b>96.9</b> | <b>3.1</b>  |
| 2001–2002                                           | 12.5        | 22.8         | 77.2        | 87.5        | 1.9         | 98.1        |
| 2002–2003                                           | 42.6        | 0.4          | 99.6        | 57.4        | 74.9        | 25.1        |
| 2003–2004                                           | 1.0         | 93.0         | 7.0         | 99.0        | 0.0         | 100.0       |
| 2004–2005                                           | 24.6        | 74.4         | 25.6        | 75.4        | 0.3         | 99.7        |
| 2005–2006                                           | 19.1        | 21.9         | 78.1        | 80.9        | 7.6         | 92.4        |
| 2006–2007                                           | 20.8        | 23.5         | 76.5        | 79.2        | 62.3        | 37.7        |
| 2007–2008                                           | 29.0        | 97.7         | 2.3         | 71.0        | 26.2        | 73.8        |
| 2008–2009                                           | 33.5        | 16.6         | 83.4        | 66.5        | 89.2        | 10.8        |
| 2009–2010                                           | 1.2         | 11.6         | 88.4        | 98.8        | 95.0        | 5.0         |
| 2010–2011                                           | 26.2        | 5.8          | 94.2        | 73.8        | 38.0        | 62.0        |
| 2011–2012                                           | 18.3        | 48.3         | 51.7        | 81.7        | 27.0        | 73.0        |
| 2012–2013                                           | 29.6        | 63.8         | 36.2        | 70.4        | 5.6         | 94.4        |
| 2013–2014                                           | 14.7        | 93.0         | 7.0         | 85.3        | 87.7        | 12.3        |
| <b>Average match<br/>scenario</b>                   | <b>21.3</b> | <b>10.3</b>  | <b>11.0</b> | <b>78.7</b> | <b>30.4</b> | <b>48.3</b> |

Source: Centers for Disease Control and Prevention (CDC) [3–5], Reed et al. [6], and Epperson et al. [7]

---

**Table S4** US influenza vaccine coverage 2013–14 season

---

| <b>Age cohort (y)</b> | <b>% vaccinated</b> |
|-----------------------|---------------------|
| 0–3                   | 72.2                |
| 4–6                   | 63.4                |
| 7–9                   | 61.0                |
| 10–19                 | 49.3                |
| 20–34                 | 32.3                |
| 35–49                 | 32.3                |
| 50–64                 | 45.3                |
| 65–69                 | 65.0                |
| 70+                   | 65.0                |

Source: Centers for Disease Control and Prevention (CDC)  
[8]

---

**Table S5** Probability of successful vaccination when vaccinated

| Age (y)                     | aTIV ≥65; QIV <65 |                |      |      | QIV      |                |      |      | TIV      |                |      |      |
|-----------------------------|-------------------|----------------|------|------|----------|----------------|------|------|----------|----------------|------|------|
|                             | Estimate          | SD of estimate | Low  | High | Estimate | SD of estimate | Low  | High | Estimate | SD of estimate | Low  | High |
| <b>Low match season</b>     |                   |                |      |      |          |                |      |      |          |                |      |      |
| 0–3                         | 0.40              | 0.05           | 0.30 | 0.51 | 0.40     | 0.05           | 0.30 | 0.51 | 0.25     | 0.04           | 0.18 | 0.33 |
| 4–6                         | 0.40              | 0.05           | 0.30 | 0.51 | 0.40     | 0.05           | 0.30 | 0.51 | 0.25     | 0.04           | 0.18 | 0.33 |
| 7–9                         | 0.65              | 0.06           | 0.52 | 0.77 | 0.65     | 0.06           | 0.52 | 0.77 | 0.56     | 0.05           | 0.47 | 0.65 |
| 10–19                       | 0.65              | 0.06           | 0.52 | 0.77 | 0.65     | 0.06           | 0.52 | 0.77 | 0.56     | 0.05           | 0.47 | 0.65 |
| 20–34                       | 0.65              | 0.06           | 0.52 | 0.77 | 0.65     | 0.06           | 0.52 | 0.77 | 0.56     | 0.05           | 0.47 | 0.65 |
| 35–49                       | 0.65              | 0.06           | 0.52 | 0.77 | 0.65     | 0.06           | 0.52 | 0.77 | 0.56     | 0.05           | 0.47 | 0.65 |
| 50–64                       | 0.60              | 0.06           | 0.48 | 0.72 | 0.60     | 0.06           | 0.48 | 0.72 | 0.50     | 0.05           | 0.41 | 0.59 |
| 65–69                       | 0.44              | 0.09           | 0.27 | 0.62 | 0.40     | 0.09           | 0.23 | 0.58 | 0.25     | 0.07           | 0.13 | 0.39 |
| 70+                         | 0.44              | 0.09           | 0.27 | 0.62 | 0.40     | 0.09           | 0.23 | 0.58 | 0.25     | 0.07           | 0.13 | 0.39 |
| <b>Average match season</b> |                   |                |      |      |          |                |      |      |          |                |      |      |
| 0–3                         | 0.40              | 0.08           | 0.26 | 0.55 | 0.40     | 0.08           | 0.26 | 0.55 | 0.37     | 0.07           | 0.23 | 0.51 |
| 4–6                         | 0.40              | 0.08           | 0.26 | 0.55 | 0.40     | 0.08           | 0.26 | 0.55 | 0.37     | 0.07           | 0.23 | 0.51 |
| 7–9                         | 0.65              | 0.09           | 0.47 | 0.81 | 0.65     | 0.09           | 0.47 | 0.81 | 0.63     | 0.09           | 0.45 | 0.79 |

|       |      |      |      |      |      |      |      |      |      |      |      |      |
|-------|------|------|------|------|------|------|------|------|------|------|------|------|
| 10-19 | 0.65 | 0.09 | 0.47 | 0.81 | 0.65 | 0.09 | 0.47 | 0.81 | 0.63 | 0.09 | 0.45 | 0.79 |
| 20-34 | 0.65 | 0.09 | 0.47 | 0.81 | 0.65 | 0.09 | 0.47 | 0.81 | 0.63 | 0.09 | 0.45 | 0.79 |
| 35-49 | 0.65 | 0.09 | 0.47 | 0.81 | 0.65 | 0.09 | 0.47 | 0.81 | 0.63 | 0.09 | 0.45 | 0.79 |
| 50-64 | 0.60 | 0.09 | 0.42 | 0.77 | 0.60 | 0.09 | 0.42 | 0.77 | 0.58 | 0.09 | 0.40 | 0.74 |
| 65-69 | 0.52 | 0.09 | 0.34 | 0.71 | 0.40 | 0.13 | 0.16 | 0.66 | 0.37 | 0.12 | 0.15 | 0.62 |
| 70+   | 0.52 | 0.09 | 0.34 | 0.71 | 0.40 | 0.13 | 0.16 | 0.66 | 0.37 | 0.12 | 0.15 | 0.62 |

**High match season**

|       |      |      |      |      |      |      |      |      |      |      |      |      |
|-------|------|------|------|------|------|------|------|------|------|------|------|------|
| 0-3   | 0.40 | 0.05 | 0.30 | 0.51 | 0.40 | 0.05 | 0.30 | 0.51 | 0.40 | 0.04 | 0.32 | 0.48 |
| 4-6   | 0.40 | 0.05 | 0.30 | 0.51 | 0.40 | 0.05 | 0.30 | 0.51 | 0.40 | 0.04 | 0.32 | 0.48 |
| 7-9   | 0.65 | 0.06 | 0.52 | 0.77 | 0.65 | 0.06 | 0.52 | 0.77 | 0.65 | 0.05 | 0.56 | 0.74 |
| 10-19 | 0.65 | 0.06 | 0.52 | 0.77 | 0.65 | 0.06 | 0.52 | 0.77 | 0.65 | 0.05 | 0.56 | 0.74 |
| 20-34 | 0.65 | 0.06 | 0.52 | 0.77 | 0.65 | 0.06 | 0.52 | 0.77 | 0.65 | 0.05 | 0.56 | 0.74 |
| 35-49 | 0.65 | 0.06 | 0.52 | 0.77 | 0.65 | 0.06 | 0.52 | 0.77 | 0.65 | 0.05 | 0.56 | 0.74 |
| 50-64 | 0.60 | 0.06 | 0.48 | 0.72 | 0.60 | 0.06 | 0.48 | 0.72 | 0.60 | 0.05 | 0.51 | 0.69 |
| 65-69 | 0.55 | 0.09 | 0.37 | 0.72 | 0.40 | 0.09 | 0.23 | 0.58 | 0.40 | 0.07 | 0.27 | 0.54 |
| 70+   | 0.55 | 0.09 | 0.37 | 0.72 | 0.40 | 0.09 | 0.23 | 0.58 | 0.40 | 0.07 | 0.27 | 0.54 |

Weighted average of age-stratified strain-specific efficacies (assumed to be the same across all matched strains for purposes of this analysis). Determined in conjunction with Beckmann Bio [9] based on meta-analysis (references available separately) [10-12]. aTIV viral effectiveness >65 y based on reduction in hospitalization observed in LIVE study [13]. Beta distribution applied for probabilistic variations

---

*aTIV* adjuvanted TIV, *QIV* quadrivalent influenza vaccine, *SD* standard deviation, *TIV* trivalent influenza vaccine

---

---

**Table S6** US influenza attack rates and conditional probabilities (Pr) of morbidity and mortality

---

| <b>Age (y)</b> | <b>Gross attack rate</b> | <b>Pr (outpatient/ influenza)</b> | <b>Pr (hospital/ influenza)</b> | <b>Pr (death/ influenza)</b> |
|----------------|--------------------------|-----------------------------------|---------------------------------|------------------------------|
| 0–4            | 0.203                    | 0.47866                           | 0.0141                          | 0.00004                      |
| 5–17           | 0.102                    | 0.351602                          | 0.0006                          | 0.00001                      |
| 18–49          | 0.066                    | 0.359488                          | 0.0042                          | 0.00009                      |
| 50–64          | 0.066                    | 0.42735                           | 0.0193                          | 0.00134                      |
| 65+            | 0.09                     | 0.7224                            | 0.0421                          | 0.0117                       |

---

Source: Molinari et al. [14]

---

## Calibration of the Model

The model was calibrated to fit a cumulative influenza incidence with observed historical US-specific data based on age-stratified trivalent influenza vaccine (TIV) vaccination rates averaging 45.8% (using the population distribution as described above) across the entire population estimated by the Centers for Disease Control and Prevention (CDC) for the 2013–2014 season [15] (**Table S4**), and age-stratified TIV vaccine effectiveness of 56.2% in an average match season based on literature sources [9–12] (**Table S5**). The proportion of the population with immunity at baseline was assumed as 67% [16]. The relative transmissibility factor  $\sigma$  was adjusted using Excel's goal-seek functionality (maximum 10,000 iterations, maximum change 0.00001) to produce cumulative influenza incidence in low (2.8%) (2000–2001 season [6]), average (8.4%) [14], and high (15.0%) (near high-end of CDC's estimated annual incidence range of 5–20% [17]) intensity influenza seasons (i.e. three calibrations) (**Table S7**).

The Excel goal-seek function was also used to ensure that the number of influenza cases by age cohort matched those obtained using age-stratified gross attack rates from Molinari et al. [14] in an average intensity, average match season. Adjusted age-stratified susceptibility factors  $\phi_i$  were applied to all scenarios (**Table S4**).

Age-stratified conditional probabilities of hospitalization and death due to influenza and complications (pneumonia, bronchitis, other respiratory illness, cardiovascular disease) were adjusted to match the conditional probabilities suggested by Molinari et al. [14], and were applied to all scenarios (**Table S9** [14, 18–22]). Because of lack of specificity of the Molinari estimates, conditional probabilities of hospitalization and death for each complication were assumed to be the same.

Transmissibility factors  $\sigma$  and the corresponding  $R_e$  values, calculated by calibrating the model to observed incidence of influenza in the United States, were as follows: (1) low intensity season = 0.54 (2.8% influenza incidence in the population) corresponding to  $R_e = 0.97$ ; (2) average season = 0.73 (8.4% incidence) corresponding to  $R_e = 1.30$ ; (3) high intensity

= 0.94 (15.0% incidence) corresponding to  $R_e = 1.70$ . The  $R_e$  range is consistent with estimates in the literature [23, 24] (**Table S7**).

---

**Table S7** Relative transmissibility  $\sigma$  calibrated to incidence of influenza

---

| <b>Scenario</b>   | <b>Relative transmissibility (<math>\sigma</math>)</b> | <b>Effective reproduction parameter (<math>R_e</math>)</b> | <b>Incidence (%)</b> | <b>Source</b>                     |
|-------------------|--------------------------------------------------------|------------------------------------------------------------|----------------------|-----------------------------------|
| Low intensity     | 0.54                                                   | 0.97                                                       | 2.8                  | Reed et al. [6]: 2000–2001 season |
| Average intensity | 0.73                                                   | 1.30                                                       | 8.4                  | Molinari et al. [14]              |
| High intensity    | 0.94                                                   | 1.70                                                       | 15.0                 | CDC [17]                          |

---

---

**Table S8** Age-stratified susceptibility

---

| <b>Age cohort</b> | <b>Susceptibility (<math>\alpha_i</math>)</b> |
|-------------------|-----------------------------------------------|
| 0-3               | 10.92                                         |
| 4-6               | 6.80                                          |
| 7-9               | 6.67                                          |
| 10-19             | 1.33                                          |
| 20-34             | 0.68                                          |
| 35-49             | 0.67                                          |
| 50-64             | 0.98                                          |
| 65-69             | 5.58                                          |
| 70+               | 4.99                                          |

---

Source: Calibrated to age-stratified gross attack rates in Molinari et al. [14], defined as average intensity, average match season then applied to all scenarios

---

## Sensitivity Analysis

Within each scenario, we conducted a probabilistic sensitivity analysis across 1000 simulation runs by varying duration of infection, vaccine efficacy, conditional probabilities of complications, hospitalization and death, as well as impacts on life-years and quality-adjusted life-years (QALYs). Variation in the intensity (severity) of the influenza season was investigated using deterministic scenarios based on influenza incidence. The impact of vaccine match on outcomes was investigated in low, average, and high match scenarios using virology surveillance data from within which vaccine efficacy was probabilistically varied using a beta distribution.

## The WAIFW (Who Acquired Infection From Whom) Matrix

The WAIFW matrix  $\beta$  is a product of the relative transmissibility parameter  $\sigma$  obtained via calibration, the contact matrix  $\gamma_{ij}$ , the susceptibility vector  $\phi_i$  by age cohort  $i$  obtained via calibration, and the force of infection vector  $\zeta_j$  by age cohort  $j$  assumed to be 1 in the model due to lack of specification.

$$\beta = (\beta_{ij}) = \sigma \cdot \gamma_{ij} \cdot \phi_i \cdot \zeta_j$$

An effective reproduction parameter,  $R_e$ , is calculated as the dominant eigenvalue of the next-generation matrix  $K$  according to Diekmann et al. [25]:

$$K = (k_{ij}) = \frac{\sigma \cdot \gamma_{ij} \cdot N_j}{N \cdot \nu}$$

where  $N_j / N$  is the proportion of the population in age cohort  $j$  and  $1/\nu$  is the duration of infection [23, 26, 27]. The challenges of measuring the reproduction parameter  $R$  (whether basic or effective) are well documented [28, 29].

Since our relative transmissibility parameter  $\sigma$  is a function of the cumulative incidence in a population which is partially immune due to previously acquired protection and vaccination in the current season, our estimate is not of the basic reproduction  $R_0$ , which is relevant for a

fully susceptible population, but rather an effective reproduction parameter  $R_e$ . Where the contact and recovery rates do not vary with time as in this model,  $R_0$  is linearly related to  $R_e$  according to the inverse of the proportion of the population that is susceptible [16].

$$R_0 = \frac{N}{S} R_e$$

Based on the model's assumptions that (a) 67% of the population is immune at baseline [16], (b) the immunization rate is 45.8% [15], and (c) an average match with TIV effectiveness of 56.2%, 24.5% of the total population is susceptible and hence  $R_0 = 1/24.5\% \times R_e = 4.08 \times R_e$ . Therefore,  $R_0$  in our simulations is 3.96, 5.30, and 6.94 in the low, average, and high intensity seasons, respectively.

### **Notes on the Calibration of Outcome Probabilities**

To match the overall age-stratified conditional probabilities of hospitalization due to influenza in Molinari et al. [14], the conditional probabilities of hospitalization due to individual complications in the population  $\geq 65$  years are  $>1$ . The discrepancy is a complication of the model and highlights the difficulty in estimating burden for a disease that is rarely confirmed with laboratory tests. The conditional probabilities of the individual complications due to influenza were sourced from the UK study of Meier et al. [20] for cases without antivirals, and a relative risk estimate was applied to Meier's data using the meta-analysis of Kaiser et al. [21] for cases with antivirals. The implication is that (1) estimates derived from Meier et al. [20] and Kaiser et al. [21] for individual influenza-related complications in the elderly in the United States are conservative, or (2) Molinari et al. [14] overestimates this burden.

Meier et al. (Meier et al. [20] estimated probabilities of influenza and complications in the primary care setting using the UK-based General Practice Research database, while Molinari et al. [14] used data from the National Center for Health Statistics and the National Hospitalization Discharge Survey to estimate excess rates of hospitalization and death due to influenza based on seasonality. We believe the Molinari estimates are more appropriate

calibration targets for the present study because the data were empirically fitted to US epidemiology with a commonly accepted and validated regression model as utilized by the CDC. The implication is that our model is conservative in its estimation of complications and related impacts on direct non-hospital costs, indirect costs, life-years, and QALYs.

## Outcomes Module Inputs

**Table S9** Outcome probabilities

| Variable                                                            | Estimate | Low   | High  | Distribution | Source               |
|---------------------------------------------------------------------|----------|-------|-------|--------------|----------------------|
| <b>Probability of influenza symptoms given infection</b>            |          |       |       |              |                      |
| All ages                                                            | 0.5      | 0.25  | 0.75  | Beta         | Carrat et al. [18]   |
| <b>Probability of medical consultation if symptomatic</b>           |          |       |       |              |                      |
| 0–3                                                                 | 0.479    | 0.266 | 0.696 | Beta         |                      |
| 4–6                                                                 | 0.394    | 0.224 | 0.578 | Beta         |                      |
| 7–9                                                                 | 0.352    | 0.205 | 0.514 | Beta         |                      |
| 10–19                                                               | 0.353    | 0.216 | 0.504 | Beta         |                      |
| 20–34                                                               | 0.359    | 0.270 | 0.455 | Beta         | Molinari et al. [14] |
| 35–49                                                               | 0.359    | 0.270 | 0.455 | Beta         |                      |
| 50–64                                                               | 0.416    | 0.285 | 0.553 | Beta         |                      |
| 65–69                                                               | 0.722    | 0.578 | 0.847 | Beta         |                      |
| 70+                                                                 | 0.722    | 0.578 | 0.847 | Beta         |                      |
| <b>Probability of antivirals prescribed if medical consultation</b> |          |       |       |              |                      |
| 0–3                                                                 | 0.277    | 0.257 | 0.298 | Beta         |                      |
| 4–6                                                                 | 0.304    | 0.282 | 0.327 | Beta         |                      |
| 7–9                                                                 | 0.333    | 0.309 | 0.357 | Beta         |                      |
| 10–19                                                               | 0.362    | 0.336 | 0.389 | Beta         |                      |
| 20–34                                                               | 0.425    | 0.394 | 0.456 | Beta         | Linder et al. [19]   |
| 35–49                                                               | 0.523    | 0.485 | 0.561 | Beta         |                      |
| 50–64                                                               | 0.619    | 0.573 | 0.664 | Beta         |                      |
| 65–69                                                               | 0.679    | 0.628 | 0.727 | Beta         |                      |
| 70+                                                                 | 0.706    | 0.654 | 0.757 | Beta         |                      |

---

**Complications**

---

**Probability of pneumonia if prescribed antivirals**

---

|       |         |         |         |      |                                          |
|-------|---------|---------|---------|------|------------------------------------------|
| 0-3   | 0.00200 | 0.00083 | 0.00368 | Beta |                                          |
| 4-6   | 0.00200 | 0.00083 | 0.00368 | Beta |                                          |
| 7-9   | 0.00200 | 0.00083 | 0.00368 | Beta |                                          |
| 10-19 | 0.00036 | 0.00007 | 0.00088 | Beta | Meier et al. [20];<br>Kaiser et al. [21] |
| 20-34 | 0.00043 | 0.00014 | 0.00087 | Beta |                                          |
| 35-49 | 0.00043 | 0.00014 | 0.00087 | Beta |                                          |
| 50-64 | 0.00071 | 0.00019 | 0.00158 | Beta |                                          |
| 65+   | 0.00879 | 0.00679 | 0.01104 | Beta |                                          |

---

**Probability of pneumonia if not prescribed antivirals**

---

|       |         |         |         |      |                   |
|-------|---------|---------|---------|------|-------------------|
| 0-9   | 0.00200 | 0.00139 | 0.00272 | Beta |                   |
| 10-19 | 0.00250 | 0.00205 | 0.00299 | Beta | Meier et al. [20] |
| 20-64 | 0.00300 | 0.00261 | 0.00342 | Beta |                   |
| 65+   | 0.01157 | 0.01004 | 0.01320 | Beta |                   |

---

**Probability of pneumonia if no medical consultation**

---

|       |         |         |         |      |                   |
|-------|---------|---------|---------|------|-------------------|
| 0-9   | 0.00200 | 0.00139 | 0.00272 | Beta |                   |
| 10-19 | 0.00250 | 0.00205 | 0.00299 | Beta | Meier et al. [20] |
| 20-64 | 0.00300 | 0.00261 | 0.00342 | Beta |                   |
| 65+   | 0.01157 | 0.01004 | 0.01320 | Beta |                   |

---

**Probability of bronchitis if prescribed antivirals**

---

|       |         |         |         |      |                                          |
|-------|---------|---------|---------|------|------------------------------------------|
| 0-9   | 0.00600 | 0.00377 | 0.00873 | Beta |                                          |
| 10-19 | 0.00454 | 0.00318 | 0.00613 | Beta |                                          |
| 20-49 | 0.00671 | 0.00534 | 0.00823 | Beta | Meier et al. [20];<br>Kaiser et al. [21] |
| 50-64 | 0.01224 | 0.00948 | 0.01534 | Beta |                                          |
| 65+   | 0.02003 | 0.01801 | 0.02215 | Beta |                                          |

---

---

**Probability of bronchitis if not prescribed antivirals**

---

|       |         |         |         |      |                   |
|-------|---------|---------|---------|------|-------------------|
| 0-9   | 0.00700 | 0.00581 | 0.00830 | Beta |                   |
| 10-19 | 0.00900 | 0.00813 | 0.00991 | Beta |                   |
| 20-49 | 0.01100 | 0.01024 | 0.01179 | Beta | Meier et al. [20] |
| 50-64 | 0.01900 | 0.01694 | 0.02117 | Beta |                   |
| 65+   | 0.03014 | 0.02766 | 0.03272 | Beta |                   |

---

**Probability of bronchitis if no medical consultation**

---

|       |         |         |         |      |                   |
|-------|---------|---------|---------|------|-------------------|
| 0-9   | 0.00700 | 0.00581 | 0.00830 | Beta |                   |
| 10-19 | 0.00900 | 0.00813 | 0.00991 | Beta |                   |
| 20-49 | 0.01100 | 0.01024 | 0.01179 | Beta | Meier et al. [20] |
| 50-64 | 0.01900 | 0.01694 | 0.02117 | Beta |                   |
| 65+   | 0.03014 | 0.02766 | 0.03272 | Beta |                   |

---

**Probability of other respiratory illness if prescribed antivirals**

---

|       |         |       |       |      |                                          |
|-------|---------|-------|-------|------|------------------------------------------|
| 0-9   | 0.08200 | 0.073 | 0.091 | Beta |                                          |
| 10-19 | 0.01725 | 0.015 | 0.020 | Beta | Meier et al. [20];<br>Kaiser et al. [21] |
| 20-64 | 0.01400 | 0.012 | 0.016 | Beta |                                          |
| 65+   | 0.01961 | 0.018 | 0.022 | Beta |                                          |

---

**Probability of other respiratory illness if not prescribed antivirals**

---

|       |         |       |       |      |                   |
|-------|---------|-------|-------|------|-------------------|
| 0-9   | 0.08600 | 0.082 | 0.090 | Beta |                   |
| 10-19 | 0.06850 | 0.066 | 0.071 | Beta |                   |
| 20-49 | 0.05100 | 0.049 | 0.053 | Beta | Meier et al. [20] |
| 50-64 | 0.04500 | 0.042 | 0.048 | Beta |                   |
| 65+   | 0.04575 | 0.043 | 0.049 | Beta |                   |

---

**Probability of other respiratory illness if no medical consultation**

---

|       |         |       |       |      |                   |
|-------|---------|-------|-------|------|-------------------|
| 0-9   | 0.08600 | 0.082 | 0.090 | Beta |                   |
| 10-19 | 0.06850 | 0.066 | 0.071 | Beta |                   |
| 20-49 | 0.05100 | 0.049 | 0.053 | Beta | Meier et al. [20] |
| 50-64 | 0.04500 | 0.042 | 0.048 | Beta |                   |

|     |         |       |       |      |  |
|-----|---------|-------|-------|------|--|
| 65+ | 0.04575 | 0.043 | 0.049 | Beta |  |
|-----|---------|-------|-------|------|--|

---

**Probability of CVD if prescribed antivirals**

---

|       |         |         |         |      |                   |
|-------|---------|---------|---------|------|-------------------|
| 0-9   | 0.00000 | 0.00000 | 0.00000 | Beta |                   |
| 10-19 | 0.00035 | 0.00007 | 0.00087 | Beta |                   |
| 20-49 | 0.00070 | 0.00031 | 0.00124 | Beta | Meier et al. [20] |
| 50-64 | 0.00400 | 0.00250 | 0.00585 | Beta |                   |
| 65+   | 0.00387 | 0.00301 | 0.00485 | Beta |                   |

---

**Probability of CVD if not prescribed antivirals**

---

|       |         |         |         |      |                   |
|-------|---------|---------|---------|------|-------------------|
| 0-9   | 0.00000 | 0.00000 | 0.00000 | Beta |                   |
| 10-19 | 0.00005 | 0.00001 | 0.00014 | Beta |                   |
| 20-49 | 0.00010 | 0.00004 | 0.00019 | Beta | Meier et al. [20] |
| 50-64 | 0.00040 | 0.00015 | 0.00076 | Beta |                   |
| 65+   | 0.00387 | 0.00301 | 0.00485 | Beta |                   |

---

**Probability of CVD if no medical consultation**

---

|       |         |         |         |      |                   |
|-------|---------|---------|---------|------|-------------------|
| 0-9   | 0.00000 | 0.00000 | 0.00000 | Beta |                   |
| 10-19 | 0.00005 | 0.00001 | 0.00014 | Beta |                   |
| 20-64 | 0.00010 | 0.00004 | 0.00019 | Beta | Meier et al. [20] |
| 65+   | 0.00387 | 0.00301 | 0.00485 | Beta |                   |

---

**Probability of otitis media if prescribed antivirals**

---

|       |         |         |         |      |                   |
|-------|---------|---------|---------|------|-------------------|
| 0-9   | 0.04100 | 0.03485 | 0.04763 | Beta |                   |
| 10-19 | 0.02450 | 0.02122 | 0.02801 | Beta |                   |
| 20-49 | 0.00800 | 0.00650 | 0.00966 | Beta | Meier et al. [20] |
| 50-64 | 0.00300 | 0.00172 | 0.00462 | Beta |                   |
| 65+   | 0.00200 | 0.00139 | 0.00271 | Beta |                   |

---

**Probability of otitis media if not prescribed antivirals**

---

|       |         |       |       |      |                   |
|-------|---------|-------|-------|------|-------------------|
| 0-9   | 0.04000 | 0.037 | 0.043 | Beta |                   |
| 10-19 | 0.02350 | 0.022 | 0.025 | Beta | Meier et al. [20] |
| 20-49 | 0.00700 | 0.006 | 0.008 | Beta |                   |

|       |         |       |       |      |
|-------|---------|-------|-------|------|
| 50–64 | 0.00300 | 0.002 | 0.004 | Beta |
| 65+   | 0.00200 | 0.001 | 0.003 | Beta |

---

**Probability of otitis media if no medical consultation**

---

|       |         |       |       |      |
|-------|---------|-------|-------|------|
| 0–9   | 0.04000 | 0.037 | 0.043 | Beta |
| 10–19 | 0.02350 | 0.022 | 0.025 | Beta |
| 20–49 | 0.00700 | 0.006 | 0.008 | Beta |
| 50–64 | 0.00300 | 0.002 | 0.004 | Beta |
| 65+   | 0.00200 | 0.001 | 0.003 | Beta |

Meier et al. [20]

---

**Hospitalization due to complications: all causes**

---

|       |        |        |        |      |
|-------|--------|--------|--------|------|
| 0–3   | 0.2989 | 0.2420 | 0.3591 | Beta |
| 4–6   | 0.1081 | 0.0878 | 0.1301 | Beta |
| 7–9   | 0.0127 | 0.0103 | 0.0153 | Beta |
| 10–19 | 0.0363 | 0.0295 | 0.0438 | Beta |
| 20–34 | 0.1436 | 0.1166 | 0.1729 | Beta |
| 35–49 | 0.1474 | 0.1197 | 0.1775 | Beta |
| 50–64 | 0.6653 | 0.5293 | 0.7887 | Beta |
| 65–69 | 1.1663 | 1.1663 | 1.1663 | Beta |
| 70+   | 1.1791 | 1.1791 | 1.1791 | Beta |

Calibrated to fit total hospitalizations by age cohort based on Molinari et al. [14]

---

**Case fatality of complications in hospital: all causes**

---

|       |        |        |        |      |
|-------|--------|--------|--------|------|
| 0–3   | 0.0008 | 0.0007 | 0.0010 | Beta |
| 4–6   | 0.0004 | 0.0003 | 0.0005 | Beta |
| 7–9   | 0.0002 | 0.0002 | 0.0003 | Beta |
| 10–19 | 0.0007 | 0.0006 | 0.0008 | Beta |
| 20–34 | 0.0030 | 0.0024 | 0.0036 | Beta |
| 35–49 | 0.0031 | 0.0025 | 0.0037 | Beta |
| 50–64 | 0.0458 | 0.0372 | 0.0552 | Beta |
| 65–69 | 0.3288 | 0.2660 | 0.3948 | Beta |
| 70+   | 0.3328 | 0.2693 | 0.3996 | Beta |

---

Calibrated to fit total deaths by age cohort based on Molinari et al. [14]

---

**Case fatality of complications outside of hospital**

---

**Pneumonia**

---

|       |        |        |        |      |                                                                                                                                                                                                                                                           |
|-------|--------|--------|--------|------|-----------------------------------------------------------------------------------------------------------------------------------------------------------------------------------------------------------------------------------------------------------|
| 0–3   | 0.0014 | 0.0012 | 0.0015 | Beta | Myles et al. [22]                                                                                                                                                                                                                                         |
| 4–6   | 0.0007 | 0.0006 | 0.0008 | Beta | Assumed case fatality is higher than hospitalized patients; observed 18.5% 30-day mortality from pneumonia in general practice, which is higher than the 30-day mortality of 8–15% reported in hospital-based studies. Standard deviation as for hospital |
| 7–9   | 0.0003 | 0.0003 | 0.0004 | Beta |                                                                                                                                                                                                                                                           |
| 10–19 | 0.0011 | 0.0010 | 0.0013 | Beta |                                                                                                                                                                                                                                                           |
| 20–34 | 0.0048 | 0.0043 | 0.0054 | Beta |                                                                                                                                                                                                                                                           |
| 35–49 | 0.0050 | 0.0044 | 0.0056 | Beta |                                                                                                                                                                                                                                                           |
| 50–64 | 0.0737 | 0.0650 | 0.0829 | Beta |                                                                                                                                                                                                                                                           |
| 65–69 | 0.5290 | 0.4643 | 0.5931 | Beta |                                                                                                                                                                                                                                                           |
| 70+   | 0.5354 | 0.4700 | 0.6003 | Beta |                                                                                                                                                                                                                                                           |

---

**Bronchitis, other respiratory illness, CVD**

Assumed same as hospitalized patients

**Otitis media**

---

|     |   |   |   |                |                          |
|-----|---|---|---|----------------|--------------------------|
| All | 0 | 0 | 0 | Not applicable | Assumed no case fatality |
|-----|---|---|---|----------------|--------------------------|

---

CVD cardiovascular disease

## REFERENCES

1. Del Valle SY, Hyman JM, Hethcote HW, Eubank SG. Mixing patterns between age groups in social networks. *Soc Netw.* 2007;29:539–54.
2. US Department of Commerce. Current Population Survey (CPS) – A Joint Effort Between the Bureau of Labor Statistics and the Census Bureau – People and Households – US Census Bureau [online document]. 2012. <http://www.census.gov/cps/> (accessed October 27, 2014).
3. Centers for Disease Control and Prevention (CDC). Update: influenza activity – United States, 2010–11 season, and composition of the 2011–12 influenza vaccine. *MMWR Morb Mortal Wkly Rep.* 2011;60:705–12.
4. Centers for Disease Control and Prevention (CDC). Update: influenza activity – United States, 2011–12 season and composition of the 2012–13 influenza vaccine. *MMWR Morb Mortal Wkly Rep.* 2012;61:414–20.
5. Centers for Disease Control and Prevention (CDC). Influenza activity – United States, 2012–13 season and composition of the 2013–14 influenza vaccine. *MMWR Morb Mortal Wkly Rep.* 2013;62:473–9.
6. Reed C, Meltzer MI, Finelli L, Fiore A. Public health impact of including two lineages of influenza B in a quadrivalent seasonal influenza vaccine. *Vaccine.* 2012;30:1993–8.
7. Epperson S, Blanton L, Kniss K, et al, on behalf of the Influenza Division NCfl, Respiratory Diseases CDC. Influenza activity – United States, 2013–14 season and composition of the 2014–15 influenza vaccines. *MMWR Morb Mortal Wkly Rep.* 2014;63:483–90.
8. Centers for Disease Control and Prevention (CDC). Flu Vaccination Coverage, United States, 2013–14 Influenza Season | FluVaxView | Seasonal Influenza (Flu) | CDC [online document]. 2014. <http://www.cdc.gov/flu/fluview/coverage-1314estimates.htm> (accessed October 27, 2014).
9. Beckmann Bio. Data on file, 2013. Nivelles, Belgium.

10. Tricco AC, Chit A, Soobiah C, et al. Comparing influenza vaccine efficacy against mismatched and matched strains: a systematic review and meta-analysis. *BMC Med.* 2013;11:153.
11. DiazGranados CA, Denis M, Plotkin S. Seasonal influenza vaccine efficacy and its determinants in children and non-elderly adults: A systematic review with meta-analyses of controlled trials. *Vaccine.* 2012;31:49–57.
12. Blyth CC, Jacoby P, Effler PV, et al, on behalf of the WAIVE Study Team. Effectiveness of trivalent flu vaccine in healthy young children. *Pediatrics.* 2014;133:e1218–e1225.
13. Mannino S, Villa M, Apolone G, et al. Effectiveness of adjuvanted influenza vaccination in elderly subjects in northern Italy. *Am J Epidemiol.* 2012;176:527–33.
14. Molinari N-AM, Ortega-Sanchez IR, Messonnier ML, et al. The annual impact of seasonal influenza in the US: measuring disease burden and costs. *Vaccine.* 2007;25:5086–96.
15. Centers for Disease Control and Prevention (CDC). Flu Vaccination Coverage, United States, 2013–14 Influenza Season | FluVaxView | Seasonal Influenza (Flu) | CDC [online document]. 2014. <http://www.cdc.gov/flu/fluview/coverage-1314estimates.htm> (accessed October 27, 2014).
16. Katriel G, Stone L. Pandemic influenza dynamics and the breakdown of herd immunity. *PLoS Curr.* 2009;1:RRN1046.
17. Seasonal Flu [online document]. 2015. Flu.gov. [http://www.flu.gov/about\\_the\\_flu/seasonal/index.html](http://www.flu.gov/about_the_flu/seasonal/index.html) (accessed June 12, 2015).
18. Carrat F, Vergu E, Ferguson NM, et al. Time lines of infection and disease in human influenza: a review of volunteer challenge studies. *Am J Epidemiol.* 2008;167:775–85.
19. Linder JA, Nieva HR, Blumentals WA. Antiviral and antibiotic prescribing for influenza in primary care. *J Gen Intern Med.* 2009;24:504–10.
20. Meier CR, Napalkov PN, Wegmüller Y, Jefferson T, Jick H. Population-based study on incidence, risk factors, clinical complications and drug utilisation associated with influenza in the United Kingdom. *Eur J Clin Microbiol Infect Dis.* 2000;19:834–42.

21. Kaiser L, Wat C, Mills T, Mahoney P, Ward P, Hayden F. Impact of oseltamivir treatment on influenza-related lower respiratory tract complications and hospitalizations. *Arch Intern Med.* 2003;163:1667–72.
22. Myles PR, Hubbard RB, Gibson JE, Pogson Z, Smith CJP, McKeever TM. Pneumonia mortality in a UK general practice population cohort. *Eur J Public Health.* 2009;19:521–6.
23. Biggerstaff M, Cauchemez S, Reed C, Gambhir M, Finelli L. Estimates of the reproduction number for seasonal, pandemic, and zoonotic influenza: a systematic review of the literature. *BMC Infect Dis.* 2014;14:480.
24. Chowell G, Miller MA, Viboud C. Seasonal influenza in the United States, France, and Australia: transmission and prospects for control. *Epidemiol Infect.* 2008;136:852–64.
25. Diekmann O, Heesterbeek JA, Roberts MG. The construction of next-generation matrices for compartmental epidemic models. *J R Soc Interface.* 2010; 7:873–85.
26. Cowling BJ, Fang VJ, Riley S, Malik Peiris JS, Leung GM. Estimation of the serial interval of influenza. *Epidemiology.* 2009;20:344–7.
27. Fraser C, Donnelly CA, Cauchemez S, et al, on behalf of the WHO Rapid Pandemic Assessment Collaboration. Pandemic potential of a strain of influenza A (H1N1): early findings. *Science.* 2009;324:1557–61.
28. Li J, Blakeley D, Smith RJ. The failure of  $R_0$ . *Comput Math Methods Med.* 2011;2011:527610.
29. Wearing HJ, Rohani P, Keeling MJ. Appropriate models for the management of infectious diseases. *PLoS Med.* 2005;2:e174.
